# Supplementary material
Source: PubMed Central journal article supplement (PMC8011615)
Supplement: AET2-5-e10580-s001.pdf [file AET2-5-e10580-s001.pdf]

The Prevalence of Lesbian, Gay, Bisexual, and Transgender Health Education and Training in Emergency Medicine Residency Programs: Where are we now?

1 **DATA SUPPLEMENT S1. 14-QUESTION SURVEY**

2 Q1 Please indicate what state your program is located in

3 Q2 What is the size of the metropolitan area your program is located in?

4 <100,000

5 100,000-250,000

6 250,000-1 million

7 >1,000,000

8 Q3 Has your program ever presented didactic lectures focused on LGBTQ+ health issues?

9 Yes

10 No

11 Q4 In addition to specific dedicated lectures, has your program incorporated LGBTQ+ health  
12 concerns into general lecture topics where LGBTQ+ patients are disproportionately  
13 affected?

14 Yes

15 No

16 Q5 Approximately how many hours of didactic lectures on LGBTQ+ health issues did your  
17 program present in 2019?

18 Q6 In your opinion, how many didactic hours per year should be devoted to LGBTQ+ health  
19 issues?

20 Q7 Has your program ever conducted a journal club or other non-didactic activity related to  
21 LGBTQ+ health issues?

22 Yes

The Prevalence of Lesbian, Gay, Bisexual, and Transgender Health Education and Training in  
Emergency Medicine Residency Programs: Where are we now?

- 23 No
- 24 Q8 Please list any barriers you have encountered to integrating LGBTQ+ disparities or topics  
25 into your curriculum and patient care
- 26 Lack of interested faculty
- 27 Lack of funding
- 28 Lack of time
- 29 Perception education is not needed
- 30 Opposition to inclusion of LGBTQ+ health topics
- 31 No barriers
- 32 Other
- 33 Q9 Please list other barriers from above
- 34 Q10 Your program faculty employer is best described as:
- 35 University
- 36 Private Group
- 37 Community Hospital
- 38 County Hospital
- 39 Other
- 40 Q11 Does your employer offer same sex domestic partner benefits?
- 41 Yes
- 42 No
- 43 I don't know
- 44 Q12 Do you currently have out LGBTQ+ faculty as part of your residency program?

The Prevalence of Lesbian, Gay, Bisexual, and Transgender Health Education and Training in  
Emergency Medicine Residency Programs: Where are we now?

45 Yes

46 Not that I am aware of

47 Q13 Do you currently have out LGBTQ+ residents as part of your residency?

48 Yes

49 Not that I am aware of

50 Q14 Does your employer offer specific protections to LGBTQ+ employees against  
51 discrimination and/or harassment?

52 Yes

53 No

54 I don't know

55

56

57

58

59

60

61

62

63

64

65

66

67

68

69

70
